1 Title:

2 **De novo mutation hotspots in homologous protein domains identify function-altering**  
3 **mutations in neurodevelopmental disorders**

4  
5 Authors and affiliations:

6 Laurens Wiel<sup>1,2,3,\*</sup>, Juliet E. Hampstead<sup>1\*</sup>, Hanka Venselaar<sup>2</sup>, Lisenka E. L. M. Vissers<sup>4</sup>, Han  
7 G. Brunner<sup>1</sup>, Rolph Pfundt<sup>4</sup>, Gerrit Vriend<sup>5</sup>, Joris A. Veltman<sup>6</sup>, and Christian Gilissen<sup>1</sup>

8  
9 1. Department of Human Genetics, Radboud Institute for Molecular Life Sciences, Radboud  
10 University Medical Center, Nijmegen, 6525 GA, the Netherlands

11 2. Centre for Molecular and Biomolecular Informatics, Radboud Institute for Molecular Life  
12 Sciences, Radboud University Medical Center, Nijmegen, 6525 GA, the Netherlands

13 3. Present address: Department of Medicine, Division of Cardiovascular Medicine, School of  
14 Medicine, Stanford University, Stanford, CA, USA

15 4. Department of Human Genetics, Donders Institute for Brain, Cognition and Behaviour,  
16 Radboud University Medical Center, Nijmegen, 6525 GA, the Netherlands

17 5. Baco Institute of Protein Science, Baco, 5201, Mindoro, Philippines.

18 6. Biosciences Institute, Faculty of Medical Sciences, Newcastle University, Newcastle upon  
19 Tyne, NE1 3BZ, United Kingdom

20  
21 \*: These authors contributed equally.

22 Corresponding author(s): Christian Gilissen

23 **Abstract**

24 Variant interpretation remains a major challenge in medical genetics. We developed Meta-  
25 Domain HotSpot (MDHS) to identify mutational hotspots across homologous protein  
26 domains. We applied MDHS to a dataset of 45,221 *de novo* mutations (DNMs) from 31,058  
27 patients with neurodevelopmental disorders (NDDs) and identified three significantly  
28 enriched missense DNM hotspots in the ion transport protein domain family (PF00520). The  
29 37 unique missense DNMs that drive enrichment affect 25 genes, 19 of which were  
30 previously associated with NDDs. 3D protein structure modelling supports function-altering  
31 effects of these mutations. Hotspot genes have a unique expression pattern in tissue, and we  
32 used this pattern alongside *in silico* predictors and population constraint information to  
33 identify candidate NDD-associated genes. We also propose a lenient version of our method,  
34 which identifies 32 hotspot positions across 16 different protein domains. These positions are  
35 enriched for likely pathogenic variation in clinical databases and DNMs in other genetic  
36 disorders.

37  
38 **Key Words**

39 Mutational hotspot detection; homologous protein domains; disease gene identification; *de*  
40 *nov*o mutations; developmental disorders; variant interpretation; pathogenicity

## 41 Introduction

42 The interpretation of sequence variation in the context of disease remains one of the biggest  
43 challenges in genetics. *De novo* mutations (DNMs) in protein-coding genes are an established  
44 cause of neurodevelopmental disorders (NDDs)<sup>1</sup>, and roughly ~45% of NDDs are caused by  
45 a DNM in a protein-coding gene.<sup>2,3</sup> By modelling the probability of DNMs occurring in  
46 specific genes, one can identify genes that are enriched for DNMs in patient cohorts,  
47 provided that large enough cohorts are available. This statistical identification of NDD-  
48 associated genes requires ever-larger patient collections.<sup>3-7</sup> A recent study of DNMs in  
49 31,058 patients with NDDs concluded that NDD-association of genes still is far from  
50 saturated and that over a thousand NDD-associated genes are still to be identified.<sup>7</sup>

51  
52 Several studies of NDD patients have found that for specific genes, missense DNMs cluster  
53 in functional regions, and that this fact can be used to identify disease-associated genes.<sup>7-9</sup>  
54 Conserved protein domains are of particular interest, because they harbour ~71%<sup>10</sup> of all  
55 curated disease-causing missense variants in the Human Gene Mutation Database (HGMD)<sup>11</sup>  
56 and ClinVar<sup>12</sup>. Indeed, missense DNMs in NDD genes are almost three times more likely  
57 located in protein domains.<sup>7</sup> Clustered missense DNMs in these genes may not act through  
58 haploinsufficiency, but rather through dominant negative or gain-of-function effects.<sup>8,9</sup> The  
59 detection of mutation clusters, or hotspots, can be a crucial step towards associating genes  
60 with NDDs<sup>13</sup> and for gaining insight into underlying disease mechanisms.<sup>9</sup>

61  
62 Aggregation of variation across homologous domains can be a useful method to gain insight  
63 into patterns of variation<sup>10,14,15</sup> and therefore can also increase statistical power to detect  
64 hotspot positions. Methods such as mCluster<sup>16</sup> and the DS-Score<sup>17</sup> have been developed to  
65 detect re-occurrence of missense mutations at equivalent positions in protein domains to  
66 identify passenger mutations in cancers. In line with the same principle, we developed Meta-  
67 Domain HotSpot (MDHS), a novel method to detect mutation clustering at evolutionary  
68 equivalent positions across homologous protein domains and applied this method to DNMs  
69 from a large cohort of NDD patients to identify protein consensus positions enriched for  
70 missense variation.

71

## 72 Results

### 73 General description of the data and the processing steps

74 To identify hotspots of *de novo* mutations in homologous protein domains, we computed  
75 MDHS (**Equation 1**) based on unique DNMs in NDD patients (**Figure 1**). This was done for  
76 each variant type separately (missense, synonymous, nonsense). We first mapped 45,221  
77 DNMs resulting from 31,058 patients with developmental disorders<sup>7</sup> onto gene transcripts  
78 using MetaDome<sup>14</sup> (**Methods**). Then, we aggregated these to 12,389 meta-domain<sup>10</sup> positions  
79 (**Supplementary Data S1**). The final 15,322 DNMs represent 73.7% missense (n=11,288),  
80 21.1% synonymous (n=3,229), and 5.3% stop-gained mutations (n=805) (**Supplementary**  
81 **Table 1**).

82

### 83 Stringent DNM hotspots identified using MDHS

84 We initially used a stringent approach where recurrent DNMs were counted only once to  
85 prevent hotspots driven by DNMs in a single gene. Using all 11,288 missense DNMs in 2,032  
86 protein domain families, our method identified three significant hotspots (**Supplementary**  
87 **Data S2-S4**) comprising 37 unique missense DNMs (57 total) in 25 different genes  
88 (**Supplementary Data S2**). Strikingly, all three hotspots are in domains belonging to the Ion  
89 Transport protein domain family (PF00520) (**Figure 2**). To validate our approach, we also  
90 performed the stringent method separately for the 3,229 synonymous and 805 stop-gained  
91 DNMs in our cohort and identified no significant hotspots (**Supplementary Data S5-S6**).

92

93 The three significant missense hotspots we identify are located on domain consensus  
94 positions p.96 (10 unique DNMs,  $p = 3.6 \times 10^{-2}$ ), p.102 (13 unique DNMs,  $p = 7.1 \times 10^{-5}$ ),  
95 and p.231 (14 unique DNMs,  $p = 7.5 \times 10^{-6}$ ) of the ion transport domain family. The Ion  
96 Transport protein domain family is one of four protein domain families that we previously  
97 found to be significantly enriched with missense DNMs in NDD-associated genes.<sup>7</sup> Of the 25  
98 'hotspot genes' identified with a missense DNM at a hotspot, 19 are known NDD-associated  
99 genes, representing a 3.17-fold enrichment of known NDD-associated genes ( $p = 1.11 \times 10^{-13}$   
100 chi-square test, **Supplementary Table 3**). The remaining 6 genes have not yet been  
101 associated with NDDs (**Table 1**).

102

### 103 Effects of missense mutations at stringent hotspots on protein structure

104 Mutations that cluster in genes have previously been associated with likely function-altering  
105 effects.<sup>9</sup> We find that 6 out of 16 hotspot genes present in the Developmental Disorder  
106 Genotype2Phenotype (DDG2P) gene list are known to have an activating or gain-of-function  
107 mutation consequence ( $p = 0.0008$ , Fisher's exact test), underscoring that missense mutations  
108 at hotspot positions are likely function-altering (**Supplementary Table 4**). To further  
109 investigate this, we created 3D protein structure homology models for each of the 25 genes  
110 (**Supplementary Data S1, Methods**). Ion transport protein domain 3D structures are 3-fold  
111 more identical to each other in conformation than their protein sequences would suggest  
112 (CATH-Gene3D ID: 1.20.120.350).<sup>18</sup> This structural overlap encouraged us to investigate  
113 whether molecular effects of missense variants at these hotspots are likely to have similar  
114 impact on domain function across the 25 genes (**Supplementary Data S8**).

115

116 In the 25 homology models we found that hotspot p.96 (**Figure 3A**) and p.102 (**Figure 3B**)  
117 are part of the voltage-sensing helix that is important for the channel (in-)activation.<sup>19</sup> These  
118 results are in line with functional studies that have been performed for missense mutations at  
119 two of these hotspots.<sup>20,21</sup> Hotspot p.231 (**Figure 3C**) is part of the channel gate at the end of  
120 a transmembrane helix (**Supplementary Data S8**). In addition, we found that missense  
121 mutations follow a specific pattern for each of these hotspots. Of the 13/16 missense DNMs

122 located at hotspot p.96 and 20/20 at p.102 change the positively charged wild-type residue to  
123 lose the positive charge. Losing positive charges at these locations has previously been  
124 described to trigger a function altering disease-mechanism (**Figure 3AB**).<sup>20,21</sup> At hotspot  
125 p.231 20/21 of the missense DNMs changes the wild-type residue from a small into a larger  
126 residue. This change in residue size likely impacts the pore closure. This hypothesis is shared  
127 by Kortüm *et al.* who suggest this likely causes a steric hindrance and result into a function-  
128 altering mechanism of disease (**Figure 3C**).<sup>22</sup> Overall, this shows that missense mutations at  
129 the identified hotspots are likely deleterious to domain function.

130

### 131 **Stringent hotspot genes are constrained against missense and loss of function variation**

132 Dominant NDD genes are characterized by population constraint against damaging genetic  
133 variation.<sup>23,24</sup> We compared observed counts of loss of function, missense, and synonymous  
134 variants in control, NDD-associated, hotspot and proposed novel hotspot genes in gnomAD  
135 v2 to expected counts based on a null mutational model.<sup>25</sup> Both hotspot and novel hotspot  
136 genes are constrained against loss of function and missense variation (**Figure 4A**). Novel  
137 hotspot genes have lower constraint against loss of function variation than hotspot genes  
138 (**Supplementary Data S9**). We also considered whether hotspots were found in regions of  
139 particular constraint against missense variation within genes. In total, 2,700 genes have  
140 statistical evidence of regional differences in missense constraint.<sup>25</sup> Of these, 16 are hotspot  
141 genes, representing a significant enrichment compared to control genes (Fisher's exact test  $p$   
142  $< 2.2 \times 10^{-16}$ ) and NDD-associated genes (Fisher's exact test  $p = 0.002$ , **Supplementary**  
143 **Figure 1**). Three are proposed novel hotspot genes (*KCNH5*, *CACNA1B*, *TPCNI*). Using  
144 regional missense constraint information, we show that PF00520 domains in hotspot genes  
145 are significantly more constrained against missense variation than PF00520 domains in  
146 control genes ( $p = 1.4 \times 10^{-7}$ , Wilcoxon rank-sum test; **Figure 4B**), but similarly constrained  
147 compared to NDD-associated genes without a hotspot that also contain a PF00520 domain ( $p$   
148  $= 0.65$ , Wilcoxon rank-sum test).

149

### 150 **Brain-specific expression of stringent hotspot genes**

151 We analysed the expression of the 19 known hotspot genes in approximately 948 donors  
152 across 54 tissues from the GTEx v8 release.<sup>26</sup> We observed that NDD genes and control  
153 genes have distinct gene expression patterns, with a higher proportion of NDD genes  
154 constitutively expressed across all tissues ( $p < 2.2 \times 10^{-16}$ , Fisher's exact test;  
155 **Supplementary Table 5**). Hotspot genes share a characteristic expression pattern compared  
156 to these two groups (**Figure 5A**), with a significantly higher proportion of hotspot genes  
157 expressed in the brain compared to control genes and significantly lower proportion  
158 expressed in all other tissues compared to NDD genes (in 40/42 non-brain tissues,  
159 **Supplementary Data S10**). Given this tissue-specific expression pattern, we grouped GTEx  
160 tissues into two tissue groups (brain and other tissues, **Methods**). The hotspot gene set is  
161 significantly enriched for genes with higher expression in brain compared to control genes  
162 (89.4% versus 19.8% expressed higher in brain,  $p = 2.985 \times 10^{-5}$ , Fisher's exact test) and  
163 NDD genes (89.4% versus 31.3%,  $p = 0.002$ , Fisher's exact test) (**Supplementary Figure 2**).  
164 Only two hotspot genes do not have higher expression in brain: *SCN10A*, which is  
165 constitutively unexpressed across tissues in GTEx samples, and *CACNA1C* (median TPM in  
166 brain = 2.94, median TPM in other tissues = 4.35). We further show that this expression  
167 pattern is not characteristic of all genes containing an ion transport domain, but only the  
168 subset of these genes statistically associated to NDDs (**Supplementary Data S11**,  
169 **Supplementary Figure 3-4**).

170

171 We also compared the TPM distribution in brain and other tissues for control genes, NDD-  
172 associated genes, hotspot genes, and the six novel hotspot genes (**Methods; Figure 5B**). Both  
173 hotspot and NDD-associated genes had significantly higher TPM in brain tissues than control  
174 genes ( $p = 0.0039$  and  $p < 2.2 \times 10^{-16}$ , Wilcoxon rank-sum test), and both hotspot genes and  
175 control genes had significantly lower TPM in other tissues than NDD-associated genes ( $p <$   
176  $2.2 \times 10^{-16}$  and  $p = 2.08 \times 10^{-8}$ , Wilcoxon-rank sum test; **Supplementary Figure 5**).  
177 Modelling suggests that *CACNA1B* and *KCNQ1* belong to the hotspot gene distribution by  
178 odds ratio (**Supplementary Data S12**). Additionally, we find 6 NDD-associated PF00520  
179 domain-containing genes (*HCN1*, *TRPV3*, *KCNQ5*, *KCNK1*, *KCNC3*, *TRPM3*) that also  
180 belong to the hotspot gene distribution by odds ratio. We hypothesize that missense mutations  
181 at hotspot positions in these 6 genes may also cause NDDs.

182

### 183 **Lenient DNM hotspots identified using MDHS**

184 We also implemented a lenient version of MDHS that counts all missense variants at protein  
185 consensus positions, even if they recur between individuals (see **Methods, Supplementary**  
186 **Figure 6**). Counting recurrent missense variants gives us more power to detect hotspot  
187 positions, but these hotspot positions may be driven by missense variation in a single domain.  
188 We detected 32 lenient missense DNM hotspots across 16 Pfam protein domain families  
189 using this method (**Supplementary Table 2**). We find a significant enrichment of genes  
190 statistically associated to NDD (Fisher's exact  $p < 2.2 \times 10^{-16}$ ) and DDG2P genes (Fisher's  
191 exact  $p < 2.2 \times 10^{-16}$ ) at lenient hotspot positions (**Supplementary Figure 7**).

192

193 We also find that missense variants at these positions are significantly more likely to be  
194 pathogenic or likely pathogenic in clinical databases (VKGL, **Figure 6A**; ClinVar, **Figure**  
195 **6B**). We compared the proportion of reported likely pathogenic (LP) missense variants at  
196 hotspot positions to those at other protein consensus positions across the 16 Pfam domain  
197 families with a lenient hotspot (**Figure 6AB**). We find a significant enrichment of LP variants  
198 at hotspot positions when we consider all positions (Fisher's exact  $p < 2.2 \times 10^{-16}$ , ClinVar;  $p$   
199  $< 2.2 \times 10^{-16}$ , VKGL), only positions without a DNM in our cohort (Fisher's exact  $p < 2.2 \times$   
200  $10^{-16}$ , ClinVar;  $p < 2.2 \times 10^{-16}$ , VKGL), and only codons without a DNM in our cohort  
201 (Fisher's exact  $p < 2.2 \times 10^{-16}$ , ClinVar;  $p = 3.08 \times 10^{-13}$ , VKGL; **Supplementary Table 6**).

202

### 203 **Lenient hotspots are enriched for missense variation in autism-spectrum disorders**

204 We investigated if we could find further evidence for the identified lenient hotspots in a  
205 combined cohort of publicly available *de novo* mutation datasets for autism-spectrum  
206 disorders (ASD; 11,986 ASD probands, 35,584 individuals) and congenital heart defects  
207 (CHD; 2,654 trios) alongside DNMs from unaffected individuals (1,740 ASD siblings, 1,548  
208 population controls; see **Methods**).

209

210 We observe a significant enrichment of missense DNMs at hotspot positions in NDD and  
211 ASD cohorts compared to unaffected individuals (Fisher's exact  $p = 3.5 \times 10^{-13}$ , NDD;  
212 Fisher's exact  $p = 0.007$ , ASD; Fisher's exact  $p = 0.07$ , CHD; **Figure 7A, Supplementary**  
213 **Table 7**). We observe no significant enrichment in synonymous DNMs at hotspot positions in  
214 any cohort (**Supplementary Table 8**). However, we predict that some lenient hotspot  
215 positions are driven by mutational processes or ascertainment bias in particular genes and not  
216 necessarily by the cumulative effect of pathogenic mutations across several genes. To correct  
217 for this, we also tested for an enrichment of missense variants unique to ASD and CHD  
218 probands at lenient hotspots (**Figure 7B, Supplementary Table 9**). We found a significant  
219 enrichment of these unique missense variants in ASD probands (Fisher's exact  $p = 0.047$ ) but  
220 not in CHD probands (Fisher's exact  $p = 1$ ). The majority (10/13, 77%) of the missense

221 variants driving this enrichment in ASD probands are in genes statistically associated to  
222 NDDs.<sup>7</sup>  
223

## 224 Discussion

225 By exploiting homology within the human genome we were able to identify mutational  
226 clustering of DNMs at evolutionarily conserved positions across genes that share protein  
227 domains. We identified three stringent (p.96, p.102, p.231) and 32 lenient mutational  
228 hotspots across 16 Pfam domain families using our MDHS method. Missense DNMs at  
229 stringent hotspots are located in 25 genes within our cohort. Structural and functional work  
230 by us and others suggest that missense mutations at these positions may be gain-of-  
231 function.<sup>27,28</sup>

232  
233 The hotspots we statistically identify in our cohort may have broader clinical relevance. We  
234 hypothesize that the 19 hotspot genes are examples of a broader class of ion transport  
235 domain-containing genes, and that missense mutations at hotspot positions in these genes are  
236 generally damaging. Our finding that clinical databases contain many pathogenic missense  
237 mutations at hotspot positions in other monogenic disease genes (**Supplementary Data S13**)  
238 support this idea. Other studies have shown that missense mutations in ion transport domain-  
239 containing genes may have position-specific functional effects.<sup>29,30</sup> Several of these mutations  
240 occur in genes not statistically associated to NDDs, indicating that missense mutations at  
241 hotspot positions could be pathogenic across a variety of disorders. In line with this, we  
242 observe that some PF00520 domain-containing NDD-associated genes have lower expression  
243 in brain but have a similar level of tissue-specific expression in a non-brain tissue. *SCN4A*,  
244 for example, is not expressed in brain and is predominantly expressed in skeletal muscle.  
245 Although the expression pattern of *SCN4A* is different from the hotspot genes presented in  
246 our analysis, hotspot positions in *SCN4A* are similarly constrained against missense variation  
247 (**Figure 5B**). We hypothesize that phenotypes associated with pathogenic mutations at  
248 hotspot positions may vary depending on where the mutated gene is expressed. For example,  
249 of the four PF00520 domain-containing genes predominantly expressed in skeletal muscle  
250 (*SCN4A*, *CACNA1S*, *RYR1*, and *KCNA7*), three of these (*SCN4A*, *RYR1*, and *CACNA1S*) have  
251 pathogenic missense variation at hotspot positions in clinical databases (**Supplementary**  
252 **Data S13**). Patients with these mutations present with disorders of the skeletal muscle,  
253 including myotonia, paramyotonia and hyperkalemic paralysis. Our work suggests that  
254 missense mutations at hotspot positions in *KCNA7* may also result in skeletal muscle  
255 disorders based on the tissue expression of *KCNA7* and the conservation of hotspot positions  
256 in the PF00520 domain of this gene.

257  
258 Our method also identified six genes with a mutation at the hotspot location that have not  
259 previously been associated with NDDs. Three genes – *KCNH5*, *CACNA1B*, and *KCNGB1* –  
260 have evidence supporting NDD association (**Supplementary Table 10**). In *KCNH5*, the same  
261 DNM was described as a variant of unknown significance (VUS) in a patient with an  
262 epileptic encephalopathy,<sup>31</sup> and studies are ongoing that associate this gene with NDD in  
263 other patients (personal communication Prof. Heather Mefford). *CACNA1B* was recently  
264 established as a NDD-associated gene on the basis of LoF DNM enrichment.<sup>32</sup> In line with  
265 this, *CACNA1B* is the only proposed novel hotspot gene that is predicted to be intolerant to  
266 heterozygous loss of function by population constraint (pLI = 1; **Supplementary Data S9**).  
267 However, our work suggests that the missense variants we identify at hotspot positions in  
268 *CACNA1B* may be function-altering. *KCNGB1* has been implicated in neuronal development<sup>33</sup>,  
269 and the expression profile matches well with that of the other NDD genes that have hotspot  
270 mutations. There is also some circumstantial evidence for two of the other three genes. Both  
271 *TPCN1* and *TPCN2* have no prior NDD-association, however, both genes are part of the  
272 mTOR complex, which has previously been associated to NDDs.<sup>34</sup> Phenotypic data for the  
273 patient with the missense DNM in *TPCN1* shows that this patient has macrocephaly and

274 severe ASD (**Supplementary Data S14**) which is in line with the fact that mTOR genes have  
275 been associated with intracranial volume and intellectual disability.<sup>35</sup> However, the only  
276 *TPCNI* missense mutation described in literature at a hotspot position (p.102) is associated  
277 with early-onset cardiomyopathy.<sup>36</sup>

278

279 In this analysis, we initially identified stringent mutation hotspots statistically using unique  
280 missense mutation counts. While MDHS analysis on even larger cohorts may identify  
281 additional hotspots, we believe our method can be used on smaller datasets by also  
282 considering recurrent mutations. Applying this lenient method to our cohort identified 32  
283 significant missense hotspots (**Supplementary Data S3**) and no significant hotspots for  
284 synonymous or nonsense mutations (**Supplementary Data S4-S5**). 12 protein domain  
285 families had hotspots spanning multiple gene-codons based on 245 DNMs from 67 genes. 48  
286 of these 67 genes (72%) are statistically associated with NDDs, representing a 2.53-fold  
287 enrichment ( $p = 1.26^{-31}$  chi-square test; **Supplementary Table 11**) and showing the merit of  
288 this approach. While the inclusion of recurrent mutations allows hotspots driven by  
289 proliferative advantages of single mutations in the germline or soma, CpG hypermutability,  
290 or biases in clinical ascertainment, it also increases power to detect robust hotspot positions  
291 (**Supplementary Figure 6**). In support of this, we find an enrichment of likely pathogenic  
292 missense variants at lenient hotspot positions in clinical databases even if we look only at  
293 codons without a mutation in our cohort, showing the merit of this approach. However,  
294 additional filtering may be required to remove hotspots driven solely by recurrent missense  
295 mutations. Additionally, there is in principle no reason to restrict this method to *de novo*  
296 mutations; it could easily be applied to rare inherited variants in large patient cohorts.

297

298 Kaplanis *et al.* estimate that approximately 350,000 parent-offspring trios would be required  
299 to detect the majority of remaining haploinsufficient genes associated with NDDs. Genes  
300 with gain-of-function effects are predicted to be even more difficult to detect, even in very  
301 large cohorts. Methods based on homology like MDHS provide a novel approach to the  
302 identification of disease genes and mechanisms in existing datasets without increasing cohort  
303 size.

304

305



### 306 Tables

| Gene                                      | Variant                                                              | Functional NDD-association                                                                                                                | gnomAD AF / SIFT / Polyphen-2 / MPC / CADD / MetaDome score                                          | DNMs in other NDD-associated genes | Clinical Interpretation*          |
|-------------------------------------------|----------------------------------------------------------------------|-------------------------------------------------------------------------------------------------------------------------------------------|------------------------------------------------------------------------------------------------------|------------------------------------|-----------------------------------|
| <i>TRPM5</i><br><a href="#">*604600</a>   | <i>ENST0000045283</i><br>3.1:c.2558G>C;<br>p.R850Q;<br>PF00520:p.102 | Unknown                                                                                                                                   | 1,20E-02 // Deleterious (0)<br>// Probably damaging (1)<br>// - // 28.7 // intolerant (0.49)         | 2;<br><i>SLC9AI</i><br><i>ADNP</i> | <i>Uncertain</i><br>(Class 3)     |
| <i>TPCN2</i><br><a href="#">*612163</a>   | <i>ENST0000029430</i><br>9.3:c.1734C>A;<br>p.R545S;<br>PF00520:p.96  | Part of the mTOR complex <sup>34</sup>                                                                                                    | - // Deleterious (0.02) // Probably damaging (0.965) // 0.80 // 23.5 // slightly intolerant (0.67)   | 0                                  |                                   |
| <i>TPCN1</i><br><a href="#">*609666</a>   | <i>ENST0000055078</i><br>5.1:c.963G>A;<br>p.R265Q;<br>PF00520:p.96   | Part of the mTOR complex <sup>34</sup>                                                                                                    | 7.97E-06 // Tolerated (0.1) // Possibly damaging (0.903) // 2.35 // 26.1 // tolerant (1.03)          | 0                                  | <i>Likely benign</i><br>(Class 2) |
| <i>KCNH5</i><br><a href="#">*605716</a>   | <i>ENST0000032289</i><br>3.7:c.1249G>A;<br>p.R327H;<br>PF00520:p.102 | Identical VUS (p.327R>H) in unrelated patient with epileptic encephalopathy <sup>31</sup>                                                 | - // Deleterious (0) // Probably damaging (0.999) // 1.93 // 32 // intolerant (0.19)                 | 0                                  |                                   |
| <i>KCNGB1</i><br><a href="#">*603788</a>  | <i>ENST0000037157</i><br>1.4:c.1332G>A;<br>p.R349H;<br>PF00520:p.102 | Involved in neuronal differentiation <sup>33</sup>                                                                                        | - // Deleterious (0) // Probably damaging (1) // 2.74 // 32 // highly intolerant (0.13)              | 0                                  |                                   |
| <i>CACNA1B</i><br><a href="#">*601012</a> | <i>ENST0000037137</i><br>2.1 c.1887G>A;<br>p.R581H;<br>PF00520:p.102 | Nonsense DNMs in <i>CACNA1B</i> lead to a NDD with seizures and nonepileptic hyperkinetic movements <a href="#">#618497</a> <sup>32</sup> | 4,58E-03 // Deleterious (0) // Probably damaging (0.999) // 1.32 // 26.1 // highly intolerant (0.13) | 0                                  |                                   |

307 **Table 1.** Overview of the novel genes for which we found variants at hotspot positions. First  
 308 column indicates the gene and OMIM identifier. Second column indicates the identified DNM  
 309 at the hotspot position. Third column indicates a previously described functional association  
 310 of the gene or variant to NDD. Fourth column indicate different prediction scores of variant  
 311 pathogenicity, the fifth indicates if the same patient has any DNMs located in known NDD-  
 312 associated genes, and sixth ACMG classification. Rows marked in grey are novel candidate  
 313 NDD genes based on additional evidence as described in this paper. Evidence for ACMG  
 314 classification is provided in **Supplementary Table 6**. Genomic positions and additional  
 315 phenotype information for all variants where available can be found in **Supplementary Data**  
 316 **S3 and S14**.

317 \*Variants were clinically interpreted where proband phenotype information was available  
 318 (see **Supplementary Data S14**).

319  
 320

321 **Figures**

322

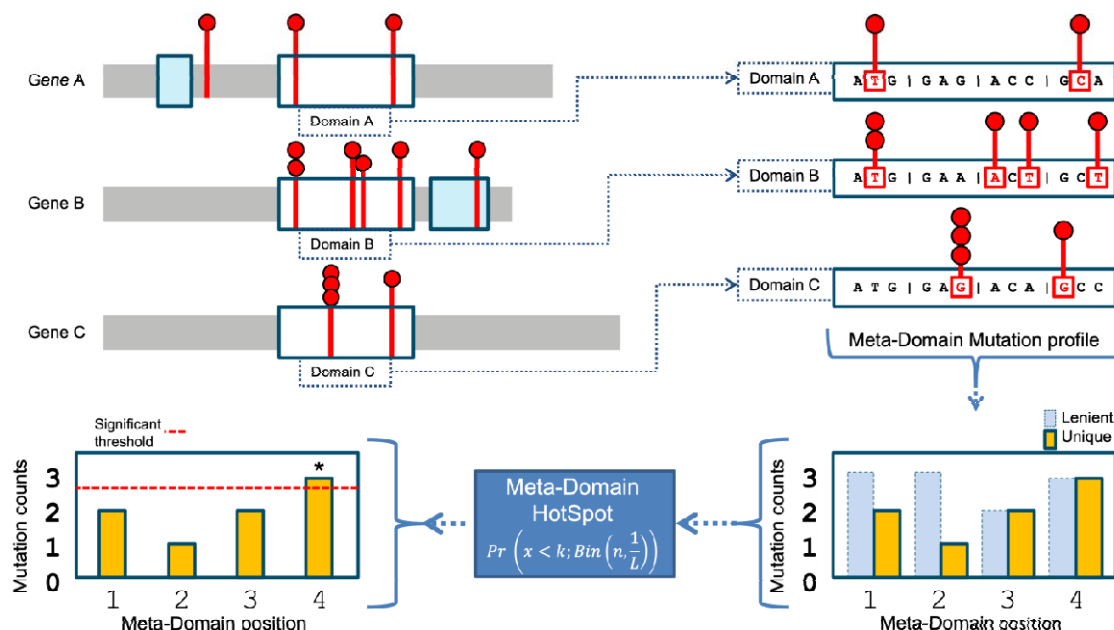

323

324

325 **Figure 1.** Workflow of how mutations are extracted from homologous domain regions within  
 326 genes and aggregated to meta-domain positions. By clockwise orientation, starting in the  
 327 upper left there are three protein representations of hypothetical genes A, B and C with the  
 328 mutations identified within a cohort are displayed as red lollipops, the domains as blue and  
 329 white boxes. The white boxes represent domains that are homologous and are extracted and  
 330 aligned, including their mutations, and displayed on the upper right part of this image as  
 331 domains A, B, and C. The mutations within a codon are then aggregated over corresponding  
 332 homologous domain positions based on sequence alignments to form a meta-domain  
 333 mutation profile (bottom right). Here, the recurring mutations are counted only once for  
 334 unique counts (for stringent hotspot identification). The unique counts are the input for  
 335 variable 'k' to compute a positional MDHS p-value (**Equation 1**). Together with the total  
 336 number of mutations 'n' in the meta-domain mutation profile the significance threshold (red  
 337 dotted line left bottom) can be determined which indicates a meta-domain hotspot if the  
 338 mutational count exceeds it.

339

340

341

342

343

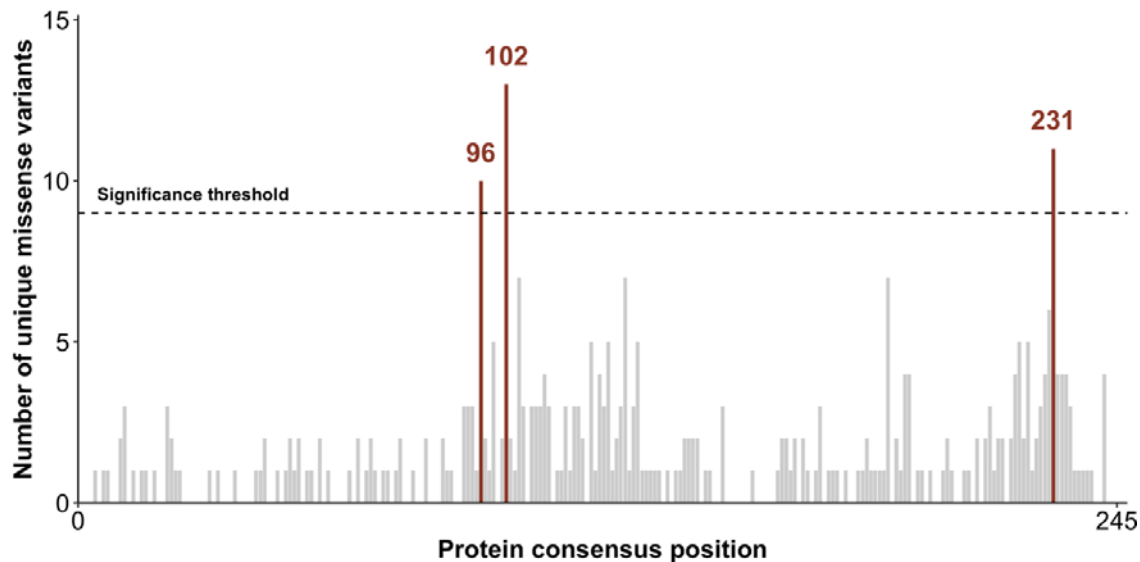

344

345

346 **Figure 2.** The count distribution of missense DNMs aggregated over the Ion Transport  
347 protein domain family (PF00520). The total consensus length of this domain is 245 and the  
348 sum of the count distribution is 350. The significance threshold is displayed as a dotted black  
349 line, computed via the MDHS (**Equation 1**). The bars that exceeded the significance  
350 threshold are coloured in red and represent the mutational hotspots p.96, p.102, and p.231.

351

352

353 A.

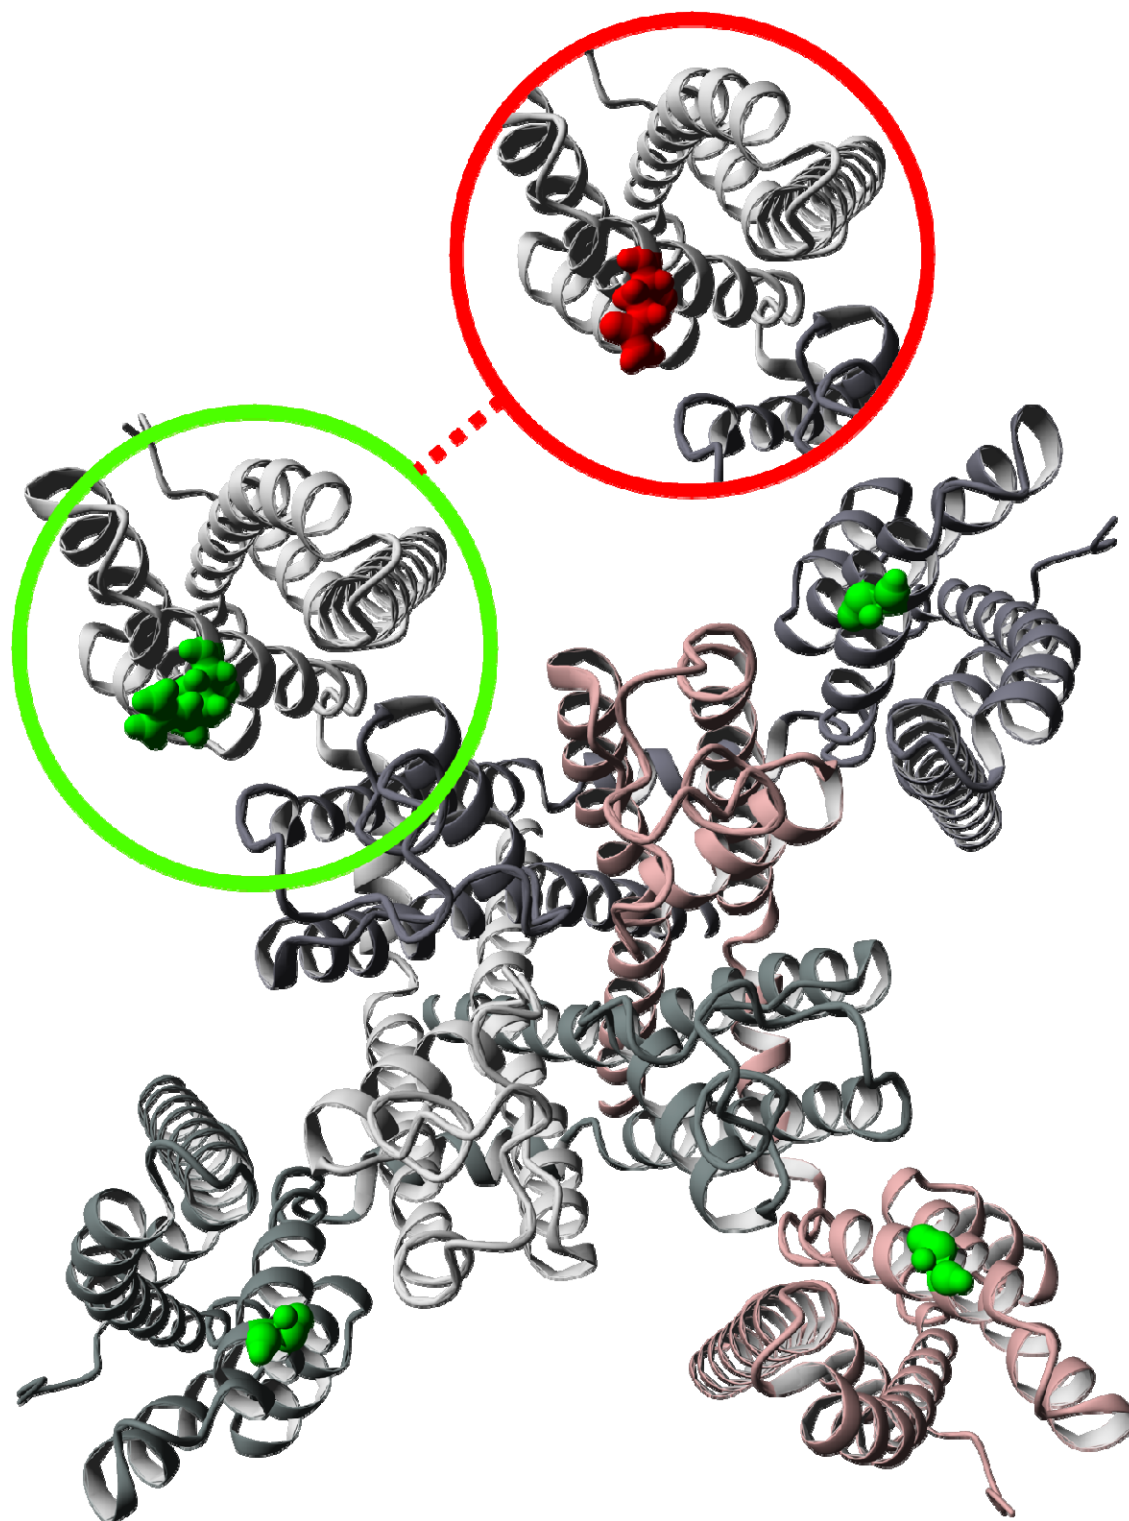

354

355 **B.**

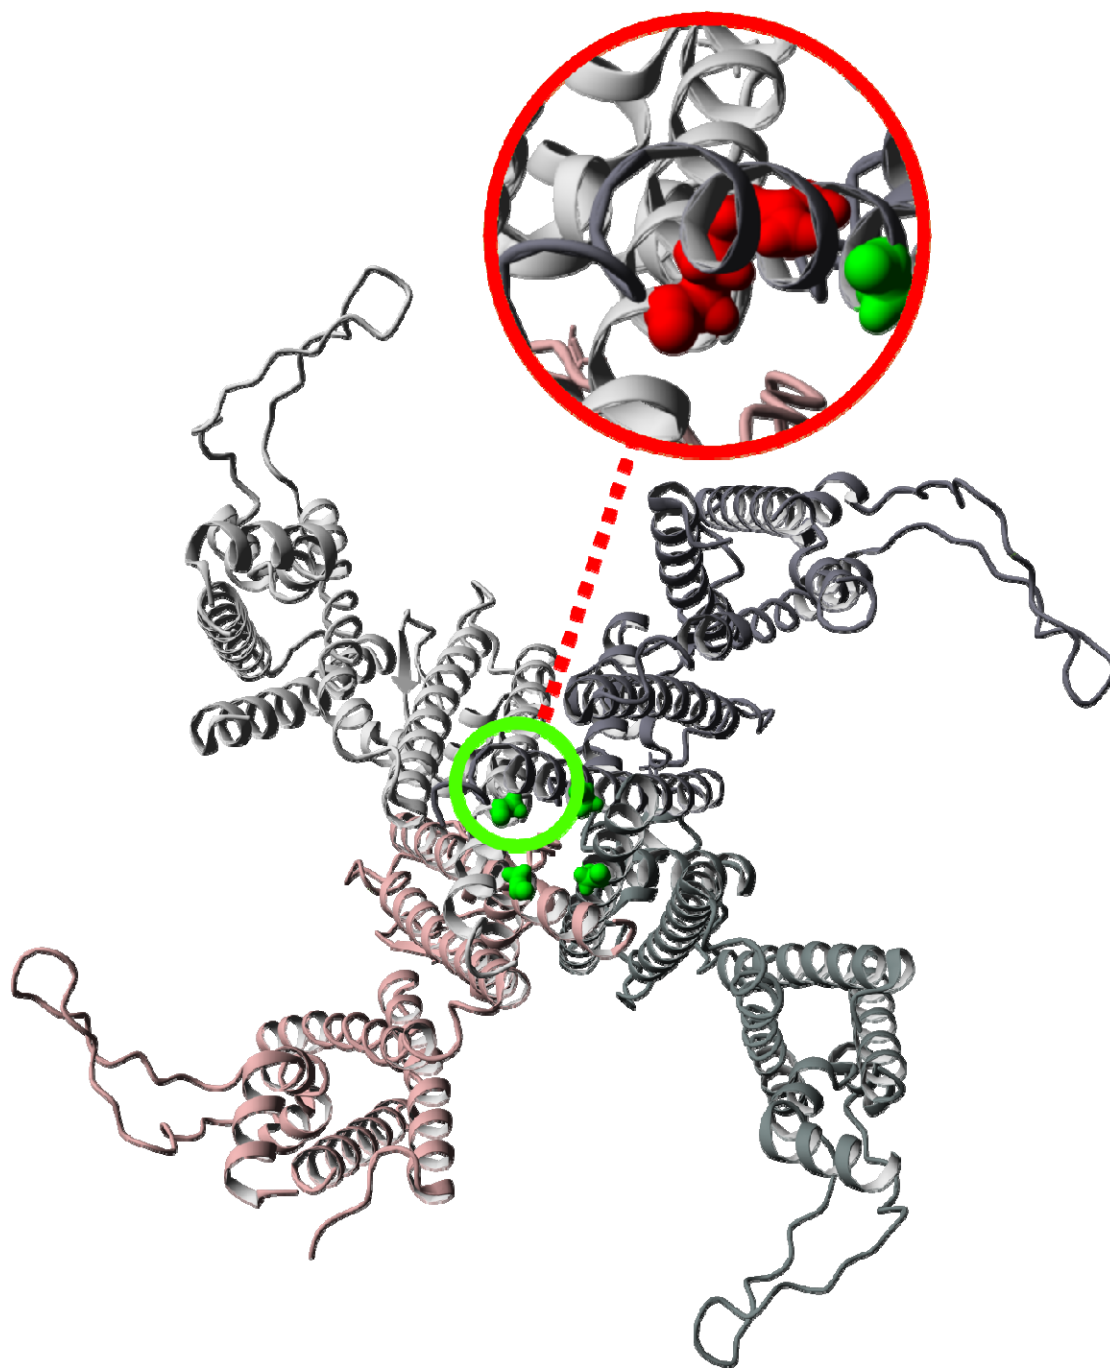

356

357 C.

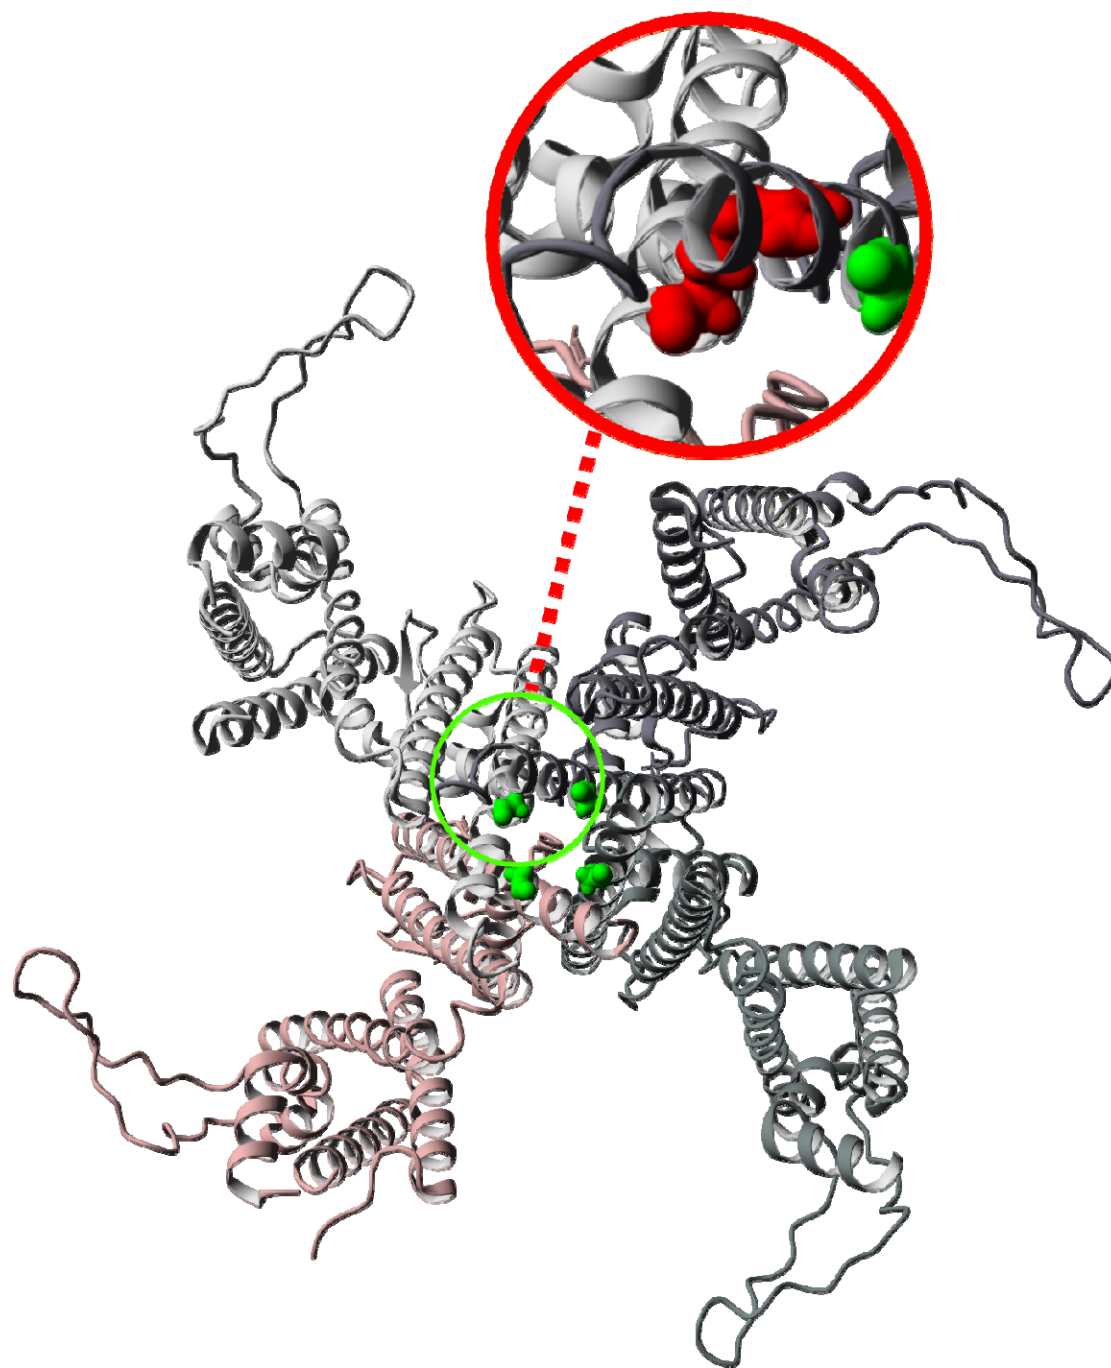

358

359

360 **Figure 3.** Changes in structure caused by missense DNMs in NDD-associated genes for each  
361 hotspot.

362 **A.** Homology model of the KCNQ3 complex with missense DNM p.R227Q marked as a green  
363 to red change. The KCNQ3 complex is a tetramer constructed from four copies of the  
364 KCNQ3 monomer. All monomers are marked in different colour shades. This DNM is located  
365 at identified hotspot p.96. The wild-type Arginine residue is part of the voltage-sensing helix  
366 and changed into a Glutamine. This change causes it to lose the positive charged that was  
367 previously found to cause a function-altering mechanism of disease.<sup>20</sup>

368 **B.** Homology model of CACNA1A with missense DNM p.R1663Q marked as a green to red  
369 change. This DNM is located at identified hotspot p.102. The wild-type Arginine residue is  
370 part of the voltage-sensing helix and changed into a Glutamine. This change causes it to lose  
371 the positive charged that was previously found to cause a function-altering mechanism of  
372 disease.<sup>21</sup>

373 **C.** Homology model of the KCNH1 complex with missense DNM p.G496R marked as a green  
374 to red change. The KCNH1 complex is a tetramer constructed from four copies of the  
375 KCNH1 monomer. All monomers are marked in different colour shades. This DNM is located  
376 at identified hotspot p.231. The wild-type Glycine residue is near the pore-closing region and  
377 changed into a much larger Arginine. This may impact pore closure and is previously  
378 reported to result into a function altering mechanism of disease.<sup>22</sup>  
379

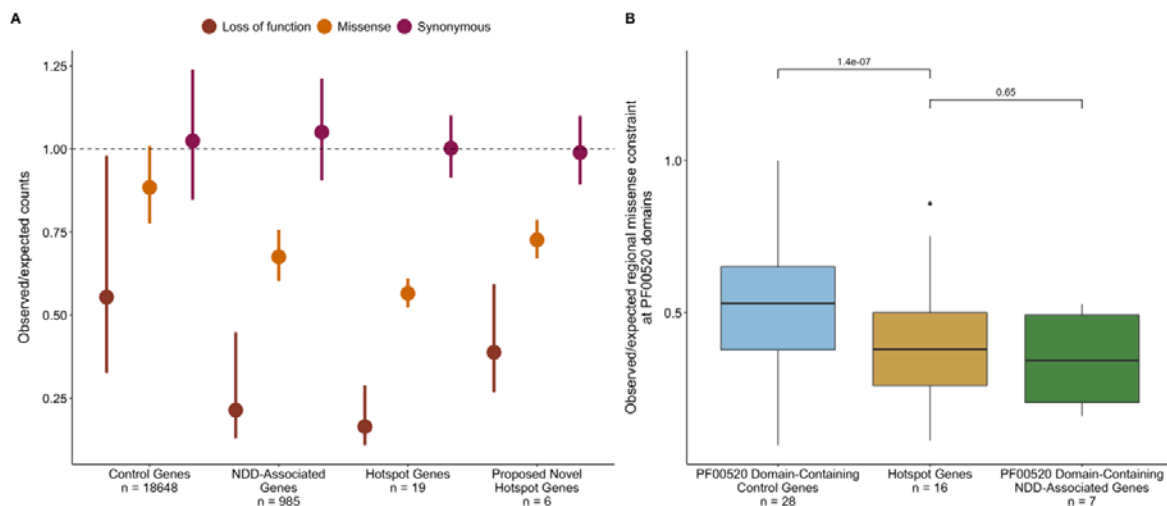

380  
381  
382  
383  
384  
385  
386  
387  
388  
389  
390  
391  
392

**Figure 4. Hotspot genes are constrained against loss of function and missense variation.**

**A) Constraint in hotspot and proposed novel hotspot genes.** The observed variant counts for loss of function (red), missense (orange), and synonymous (pink) variants from the gnomAD v2 release were compared to the expected counts based on a null mutational model (Samocha *et. al.*, 2017). Points represent the mean observed/expected ratios for all genes in each set and bars denote the mean upper and lower bound fractions for these ratios. The dashed line at observed/expected = 1 indicates perfect adherence to the null mutational model (observed counts = expected counts); values that fall below this line are constrained.

**B) Mutation hotspots occur in missense constrained regions within genes.** Regional missense constraint was compared across PF00520 domain-containing control genes (blue), PF00520 domain-containing NDD-associated genes (green) and hotspot genes (yellow).



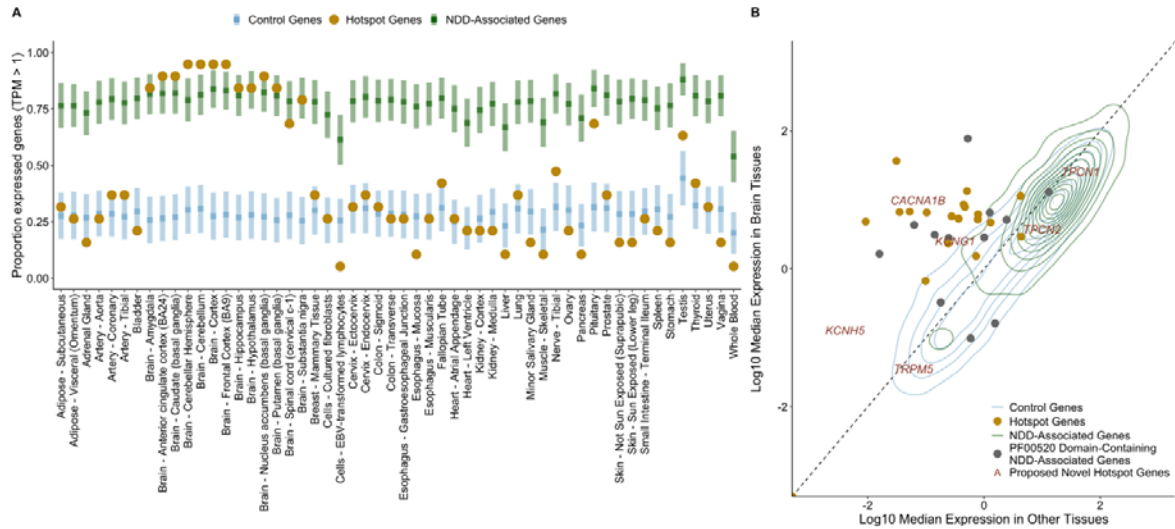

393  
394  
395  
396  
397  
398  
399  
400  
401  
402  
403  
404  
405

**Figure 5. Hotspot genes have a distinct gene expression pattern.**

**A)** Tissue expression of hotspot genes compared to control and other NDD genes. Expression of the 19 established NDD genes containing missense DNM(s) at a stringent mutation hotspots (hotspot genes, yellow) were evaluated across 54 GTEx tissues (x-axis). Hotspot gene expression was compared to NDD genes (green) and control genes (blue). The y-axis depicts the proportion of expressed genes (**Methods**). Squares and bars depict the median and standard deviation respectively of NDD and control gene distributions.

**B)** TPM distribution in brain and other tissues varies across gene sets. Control (blue) and NDD-associated (green) genes are represented by 2D density distributions. Hotspot genes (yellow) are shown as points, as are NDD-associated genes containing a PF00520 domain (grey). Proposed novel hotspot genes are marked by their gene name in red text.

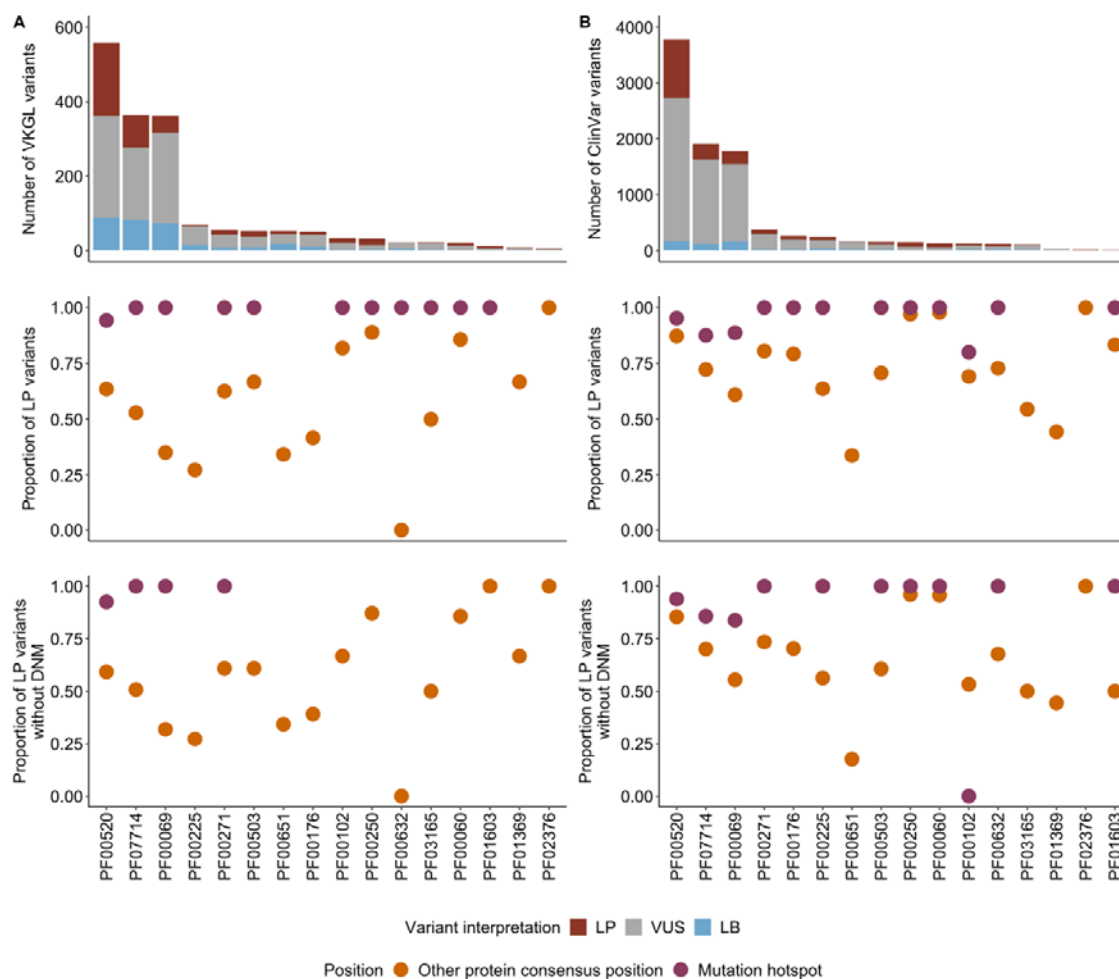

406  
407  
408  
409  
410  
411  
412  
413  
414  
415  
416

**Figure 6. Lenient hotspots are enriched for likely pathogenic missense variation in clinical databases.** Counts of likely pathogenic (LP, red), uncertain (VUS, grey) and likely benign (LB, blue) missense variants in VKGL (A) and ClinVar (B) in domains containing a lenient hotspot position. The proportion of LP missense variants (LP/(LP + LB), see **Methods**) was compared between mutation hotspots (purple) and all other protein consensus positions within the domain (orange). This comparison was done for all possible missense variants in these domains (row 2) and with positions containing DNMs in our cohort excluded (row 3).

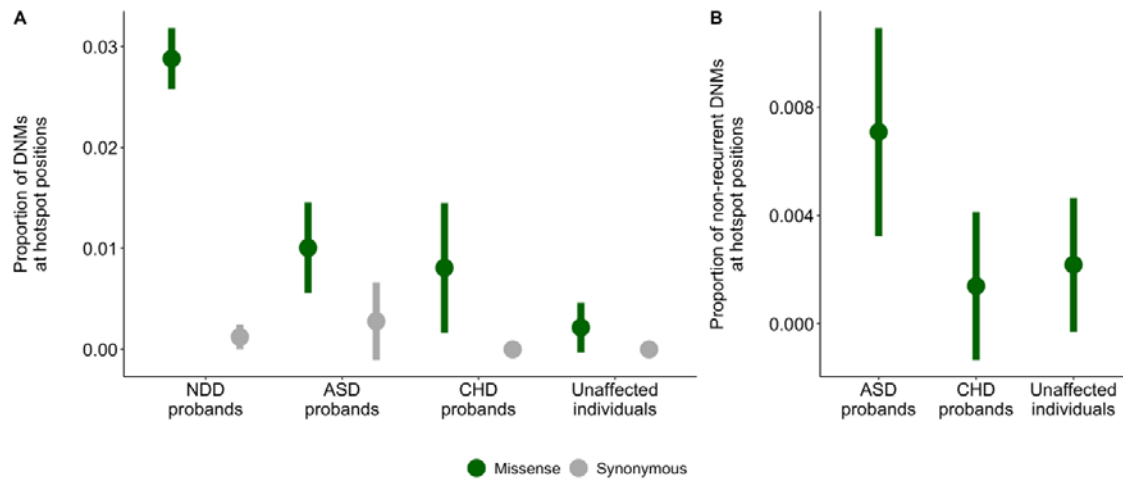

417

418 **Figure 7. Patients are enriched for missense variants in lenient hotspot positions**  
419 **compared to healthy population controls.** A) NDD and ASD are enriched for missense  
420 DNMs in lenient hotspot positions compared to unaffected individuals (green) but are not  
421 enriched for synonymous DNMs (grey). Only DNMs within protein consensus positions were  
422 used for this comparison (see **Methods**). B) ASD probands are enriched for missense DNMs  
423 in lenient hotspot positions (green) not present in our NDD cohort.  
424

## 425 **Materials and Methods**

### 426 **Dataset of *de novo* mutations**

427 We obtained the set of 45,221 DNMs from the Kaplanis *et al* study.<sup>7</sup> These DNMs were  
428 identified in 31,058 DD patients combined across three centres. The genetic testing approach  
429 of these patients were described previously per centre: DDD,<sup>3</sup> GeneDX,<sup>37</sup> and, Radboudumc.<sup>4</sup>  
430 All individuals that underwent genetic testing provided informed consent.<sup>7</sup> Subsets of these  
431 patients have been analysed and reported in previous publications.<sup>3,23,37,38</sup>

### 433 **Developmental disorder diagnostic gene lists**

434 We use the diagnostic lists of DD-associated genes from the Kaplanis *et al.* study. We  
435 consider all genes statistically associated to NDDs in this study to be NDD genes (novel,  
436 consensus, and discordant genes, total genes = 1010).<sup>7</sup>

437  
438 Additionally, we used the Deciphering Developmental Disorders Genotype2Phenotype  
439 (DDG2P, accessed 22-04-2021) list to assess the burden of gain of function mutational  
440 mechanisms already described in hotspot gene families. We considered activating, gain of  
441 function, dominant negative, and increased gene dosage mutation consequences in this list to  
442 be gain of function.

443

### 444 **Annotation of transcript details, protein and meta-domain position annotation**

445 The DNMs were annotated with corresponding GENCODE<sup>39</sup> transcripts from release 19  
446 GRCh37.p13 Basic set, protein information from UniProtKB/Swiss-Prot<sup>40</sup> Release 2016\_09,  
447 Pfam-A<sup>41</sup> v30.0 protein domains information, and meta-domain<sup>10</sup> positions using a local  
448 version of the MetaDome<sup>14</sup> web server (code available at  
449 <https://github.com/cmbi/metadome>). Meta-domains are multiple sequence alignments of  
450 regions within human protein-coding genes that correspond to Pfam protein domain families.  
451 The DNMs that correspond to Pfam consensus positions are annotated with the corresponding  
452 Pfam domain ID and consensus position.

453

### 454 **Filtering the annotated DNMs**

455 The annotation process can result in multiple GENCODE gene transcripts per DNM. To  
456 ensure a single GENCODE transcript per gene we performed a filtering step by the following  
457 order of criteria:

- 458 1. Filter to variants that with transcript consequence: missense, synonymous, or, stop-  
459 gained
- 460 2. The transcript corresponds to a human canonical or isoform entry in Swiss-Prot
- 461 3. This transcript contains all (or most) of the *de novo* mutations for the corresponding  
462 gene
- 463 4. The transcript translates to the longest protein sequence length
- 464 5. If multiple transcripts remain for a gene, one of these is selected
- 465 6. Filter variants only to those that are in a Pfam protein domain

466

### 467 **MDHS: Detection of variant hotspots in homologous protein domains**

468 The Pfam domain ID and consensus position allows for aggregation of genetic variants  
469 through meta-domain positions. To identify meta-domain positions that are significantly  
470 enriched with variants we created the MDHS (Meta-Domain HotSpot) p-value as follows:

471

$$\text{MDHS p-value} = Pr \left( x < k; \text{Bin} \left( n, \frac{1}{L} \right) \right) \quad (1.)$$

472

473 In the context of meta-domains,  $n$  corresponds to the total number of aggregated genetic  
474 variants for the Pfam domain ID,  $L$  is the total number of possible consensus positions for a  
475 Pfam domain ID,  $k$  is the total number of genetic variants aggregated at a single consensus  
476 position, and  $x = k - 1$ , which depicts the chance of finding less than observed genetic  
477 variants at the consensus position. The MDHS p-value is adapted from the mCluster<sup>16</sup> and  
478 DS-Score<sup>17</sup>. In line with these methods, variants are assumed to follow a Binomial  
479 distribution. We correct the MDHS p-value via the Bonferroni method for the total number of  
480 Pfam protein domain IDs considered. If a Bonferroni corrected MDHS p-value  $< 0.05$ , we  
481 consider it as a significant mutational hotspot.

482  
483 Our code to analyse the MDHS p-value was optimized to only compute for domains which  
484 can have significant hotspots. It implements a filter for domain families which works as  
485 follows: 1.) Count the number of domain consensus positions with one or more variant as  
486 '*n\_hotspot\_candidates*'. 2.) Count the number of DNMs that span at least more than one  
487 unique protein position at each consensus position and sum them up to represent  
488 '*n\_hotspots\_with\_variation\_from\_more\_than\_one\_protein\_position*'. 3.) Apply the filter  
489 criteria such that each domain family abides:

$$\frac{n\_hotspots\_with\_variation\_from\_more\_than\_one\_protein\_position}{n\_hotspot\_candidates} > 1$$

491  
492 See the value at column 'hotspot\_uniqueness' in **Supplementary Data S2, S5, S6**.

#### 493 494 **Stringent and lenient counting of variants in MDHS**

495 We use two ways to determine variable  $k$  in the MDHS p-value (**Equation 1**). Unless  
496 otherwise specified, we count unique variants by considering mutated chromosomal positions  
497 only once, thereby reducing the impact of recurrent mutations in a single gene (stringent).  
498 Alternatively, we refer to a lenient way of variant counting when we count every mutation  
499 equally (including recurrent mutations). For a schematic, see **Figure 1**.

#### 500 501 **Functional characterization**

502 We used the Ensembl Variant Effect Predictor (VEP)<sup>42</sup> to annotate gnomAD allele frequency  
503 (AF)<sup>24</sup>, SIFT<sup>43</sup>, Polyphen-2<sup>44</sup>, MPC<sup>25</sup>, and the CADD\_Phred<sup>45</sup>. MetaDome<sup>14</sup> tolerance  
504 indication based on regional  $d_N/d_S$  was obtained manually. ACMG<sup>46</sup> classification was  
505 obtained through variant curation by a laboratory specialist. Available phenotype information  
506 for patients with missense mutations in hotspot positions can be found in **Supplementary**  
507 **Data S14**.

#### 508 509 **Protein 3D structure modelling of the genes with identified hotspots**

510 For each of the 25 genes with a DNM located at one of the hotspots we submitted the  
511 corresponding protein sequence (based on the transcript of **Filtering the annotated DNMs**)  
512 to the YASARA & WHAT IF Twinset<sup>47,48</sup> homology modelling script using the default  
513 settings. The regions corresponding to the PF00520 were extracted from all resulting  
514 homology structures and combined in a single YASARA scene and then structurally aligned  
515 using the MOTIF script. The structures are available in **Supplementary Data S7**. The protein  
516 structure effects of mutations have been reported in **Supplementary Data S8**.

#### 517 518 **Population constraint**

519 Constraint information, including observed and expected counts, z-scores, and pLI, pNull,  
520 and pRec were calculated on gnomAD v2.1.1.<sup>24</sup>

521

## 522 **Regional missense constraint**

523 Genes with regions of differential missense constraint were identified as described by  
524 Samocha *et. al*, 2017 in the ExAC<sup>49</sup> dataset. In brief, the fraction of observed missense  
525 variation along a transcript was tested for uniformity using a likelihood ratio test. If the  
526 distribution was not uniform, the transcript was considered to have evidence of regional  
527 missense constraint. 2,700 genes showed evidence of at least two regions of distinct missense  
528 constraint using this method.

529

## 530 **Expression data**

531 Pre-computed tissue expression values in transcripts per million (TPM) were taken from  
532 GTEx v8 (GTEx\_Analysis\_2017-06-05\_v8\_RNASeQCv1.1.9\_gene\_median\_tpm.gct.gz).<sup>26,50</sup>

533

## 534 **Gene sets for constraint and expression analysis**

535 The set of 56,200 genes for which median TPM values were available was divided into one  
536 of four sets: proposed novel hotspot genes, hotspot genes, NDD-associated genes, and control  
537 genes. Genes containing a mutation hotspot were divided into two categories: hotspot genes,  
538  $n = 19$ , and proposed novel hotspot genes,  $n = 6$ . These categories were distinguished by  
539 presence on the DD gene list (see **Developmental disorder diagnostic gene lists**); hotspot  
540 genes are present on this list while proposed novel hotspot genes are not. The remaining  
541 genes were divided into NDD-associated genes ( $n = 992$ , excluding hotspot genes) and  
542 control genes not statistically associated with intellectual disability or developmental delay ( $n$   
543  $= 55,183$ ). For some analyses, control genes present in DDG2P ( $n = 1,250$ , accessed 22-04-  
544 2021) or OMIM ( $n = 3,402$ , accessed 31-08-2021) but not statistically associated to NDDs  
545 were considered separate classes. Additionally, only some of these genes had population  
546 constraint information available from gnomAD v2.1.1 ( $n = 19,658$ ). Genes in all sets can be  
547 found in **Supplementary Data S15**.

548

549 Of the 56,200 genes described above, 105 contained a PF00520 domain in MetaDome v1.0.1.  
550 These 105 genes represented 19 hotspot genes, 6 proposed novel hotspot genes, 12 NDD-  
551 associated genes not containing a missense DNM at a hotspot position in our cohort, and 68  
552 control genes (of which 6 are present in DDG2P and 26 in OMIM; **Supplementary Data**  
553 **S16**).

554

## 555 **Proportion of expressed genes across GTEx tissues**

556 A fixed level of TPM  $> 1$  was used to define expression in each tissue. NDD-associated and  
557 control genes were randomly sampled 1000 times into sets of 19 genes, and the proportion of  
558 expressed genes (number of genes with TPM  $> 1$ /total number of genes) was calculated for  
559 each set. This generated a distribution of proportions across 54 GTEx tissues. The proportion  
560 of expressed hotspot genes per tissue was computed without sampling.

561

## 562 **TPM differences between tissue groups**

563 In order to assess expression differences between brain and other tissues, GTEx tissues were  
564 divided into two groups. We considered the amygdala, anterior cingulate cortex (BA24),  
565 caudate (basal ganglia), cerebellar hemisphere, cerebellum, cortex, frontal cortex (BA9),  
566 hippocampus, hypothalamus, nucleus accumbens (basal ganglia), putamen (basal ganglia),  
567 spinal cord (cervical c-1), and substantia nigra brain tissues ( $n = 12$ ). All non-brain tissues  
568 were included in the 'other tissues' set ( $n = 42$ ). The TPM value for each tissue set was  
569 defined as the median TPM of all tissues in the set. Based on these differences, we modelled  
570 the brain TPM distribution in hotspot genes and control genes and the other tissue TPM

571 distribution in hotspot genes and NDD-associated genes as normal distributions. For each set  
572 of distributions, a likelihood ratio of belonging to each distribution was calculated. Proposed  
573 novel hotspot genes were considered to have evidence for association with NDDs if they  
574 were more likely to belong to the hotspot gene distribution across both tests.

575

### 576 **Filtering and annotation of additional *de novo* mutation cohorts**

577 We analysed the enrichment of missense and synonymous DNMs in lenient hotspot positions  
578 across a total of three additional published DNM cohorts. We used an autism-spectrum  
579 disorder (ASD) cohort published by Satterstrom *et al.* (35,584 total individuals, 11,986 with  
580 ASD), a congenital heart defect (CHD) cohort published by Jin *et al.* (2,645 trios), and a  
581 cohort of healthy individuals sequenced by Jonsson *et al.* (1,548 trios). To increase our power  
582 to find significant differences at lenient hotspot positions, we pooled the Jonsson *et al.*  
583 healthy individuals with unaffected siblings from the Satterstrom ASD cohort (1,740 siblings)  
584 for a total of 3,288 unaffected individuals.

585

586 Annotation of meta-domain protein consensus positions for these datasets was done as  
587 previously described for Kaplanis *et al.* using MetaDome. The number of PTV, missense, and  
588 synonymous SNVs in Pfam protein domains in each dataset can be found in **Supplementary**  
589 **Table 12**.

590

### 591 **Variant annotation**

592 Variants at protein consensus positions were checked for clinical interpretation across four  
593 curated variant databases: ClinVar, HGMDPro, Swiss-Prot and VKGL, all accessed 21-08-  
594 2021. Mapping of protein consensus positions to GRCh37 genomic positions for each gene as  
595 done using MetaDome.

596 For analysis on stringent hotspot positions, ClinVar data was unfiltered on evidence level or  
597 review status. We classified missense variation as LP (pathogenic or likely pathogenic,  
598 ACMG Class V or IV) or VUS (variant of uncertain significance, ACMG Class III) based on  
599 the most severe class across all four databases (Supplementary Data S13).

600 For the enrichment analysis on lenient hotspot positions, only ClinVar and VKGL data was  
601 used because these two databases include likely benign variants. ClinVar data was filtered on  
602 review status (required to be one of 'practice guideline', 'reviewed by expert panel', 'criteria  
603 provided, multiple submitters, no conflicts', 'criteria provided, single submitter'). Variants  
604 were classified as LP (ACMG Class V or IV), VUS (ACMG Class III) or LB (benign or  
605 likely benign, ACMG Class II or I). Variants with conflicting interpretations of pathogenicity  
606 within or between databases (LP and LB annotations) were removed, as were variants with  
607 only VUS annotations.

608

### 609 **Code availability and data access**

610 Constraint and expression analysis was done in R version 3.6.2. Code and data to reproduce  
611 all parts of the analysis is available on GitHub  
612 (<https://github.com/cmbi/MetaDomainHotSpot>). MetaDome was used to annotate meta-  
613 domains, the source code for this is also available on Github  
614 (<https://github.com/cmbi/metadome>).

615

## 616 **Acknowledgements**

617 We thank Dr. Torti and Dr. Retterer from GeneDX for connecting us with Prof. Mefford. We  
618 thank Prof. Mefford for information regarding the likely NDD-association of *KCHN5*. We  
619 thank Elke de Boer for useful discussions. This work was in part financially supported by  
620 grants from the Netherlands Organization for Scientific Research (916-14-043 to C.G. and  
621 918-15-667 to J.A.V.), and from the Radboud Institute for Molecular Life Sciences, Radboud  
622 University Medical Center (R0002793 to G.V.).

## 623 **URLs**

624 YASARA: <http://www.yasara.org/>  
625 CATH-Gene3D: <http://www.cathdb.info/>  
626 Variant Effect Predictor: <https://www.ensembl.org/Tools/VEP>  
627 GTEEx: <https://www.gtexportal.org/home/>  
628 MetaDome web server: <https://stuart.radboudumc.nl/metadome/>  
629 MetaDome GitHub repository: <https://github.com/cmbi/metadome>  
630 MetaDomainHotspot analyses repository: <https://github.com/cmbi/MetaDomainHotSpot>  
631 DECIPHER: <https://www.deciphergenomics.org/>  
632 HGMD: <http://www.hgmd.cf.ac.uk/ac/index.php>  
633 ClinVar: <https://www.ncbi.nlm.nih.gov/clinvar/>  
634 Swiss-Prot: <https://www.uniprot.org/>  
635 VKGL: <https://www.vkgl.nl/nl/diagnostiek/vkgl-datashare-database>

## 636 **medRxiv Note**

637 Our **Supplementary Data S7** file (YASARA protein structures) cannot be made available  
638 through medRxiv. Please contact the corresponding author for this data.  
639



## 640 References

- 641 1. Veltman, J. a & Brunner, H. G. De novo mutations in human genetic disease. *Nat. Rev.*  
642 *Genet.* **13**, 565–75 (2012).
- 643 2. Martin, H. C. *et al.* Quantifying the contribution of recessive coding variation to  
644 developmental disorders. *Science (80-. )*. **362**, 1161–1164 (2018).
- 645 3. Deciphering Developmental Disorders Study. Prevalence and architecture of de novo  
646 mutations in developmental disorders. *Nature* **542**, 433–438 (2017).
- 647 4. de Ligt, J. *et al.* Diagnostic exome sequencing in persons with severe intellectual  
648 disability. *N. Engl. J. Med.* **367**, 1921–9 (2012).
- 649 5. Deciphering Developmental Disorders Study *et al.* Large-scale discovery of novel  
650 genetic causes of developmental disorders. *Nature* **519**, 223–228 (2015).
- 651 6. Turner, T. N. *et al.* denovo-db: a compendium of human de novo variants. *Nucleic*  
652 *Acids Res.* **45**, D804–D811 (2017).
- 653 7. Kaplanis, J. *et al.* Evidence for 28 genetic disorders discovered by combining  
654 healthcare and research data. *Nature* (2020). doi:10.1038/s41586-020-2832-5
- 655 8. Geisheker, M. R. *et al.* Hotspots of missense mutation identify neurodevelopmental  
656 disorder genes and functional domains. *Nat. Neurosci.* **20**, 1043–1051 (2017).
- 657 9. Lelieveld, S. H. *et al.* Spatial Clustering of de Novo Missense Mutations Identifies  
658 Candidate Neurodevelopmental Disorder-Associated Genes. *Am. J. Hum. Genet.* **101**,  
659 478–484 (2017).
- 660 10. Wiel, L., Venselaar, H., Veltman, J. A., Vriend, G. & Gilissen, C. Aggregation of  
661 population-based genetic variation over protein domain homologues and its potential  
662 use in genetic diagnostics. *Hum. Mutat.* 1–10 (2017). doi:10.1002/humu.23313
- 663 11. Stenson, P. D. *et al.* The Human Gene Mutation Database: towards a comprehensive  
664 repository of inherited mutation data for medical research, genetic diagnosis and next-  
665 generation sequencing studies. *Hum. Genet.* **136**, 1–13 (2017).
- 666 12. Landrum, M. J. *et al.* ClinVar: public archive of interpretations of clinically relevant  
667 variants. *Nucleic Acids Res.* **44**, D862-8 (2016).
- 668 13. Schuurs-Hoeijmakers, J. H. M. *et al.* Recurrent de novo mutations in PACS1 cause  
669 defective cranial-neural-crest migration and define a recognizable intellectual-  
670 disability syndrome. *Am. J. Hum. Genet.* **91**, 1122–7 (2012).
- 671 14. Wiel, L. *et al.* MetaDome: Pathogenicity analysis of genetic variants through  
672 aggregation of homologous human protein domains. *Hum. Mutat.* **40**, humu.23798  
673 (2019).
- 674 15. Peterson, T. A., Park, D. H. & Kann, M. G. A protein domain-centric approach for the  
675 comparative analysis of human and yeast phenotypically relevant mutations. *BMC*  
676 *Genomics* **14 Suppl 3**, (2013).
- 677 16. Yue, P. *et al.* Inferring the functional effects of mutation through clusters of mutations  
678 in homologous proteins. *Hum. Mutat.* **31**, 264–271 (2010).
- 679 17. Peterson, T. A., Nehrt, N. L., Park, D. H. & Kann, M. G. Incorporating molecular and  
680 functional context into the analysis and prioritization of human variants associated  
681 with cancer. *J. Am. Med. Informatics Assoc.* **19**, 275–283 (2012).
- 682 18. Sillitoe, I., Lewis, T. & Orengo, C. Using CATH-Gene3D to Analyze the Sequence,  
683 Structure, and Function of Proteins. *Curr. Protoc. Bioinforma.* **50**, 1.28.1-1.28.21  
684 (2015).
- 685 19. Bezanilla, F. How membrane proteins sense voltage. *Nat. Rev. Mol. Cell Biol.* **9**, 323–  
686 332 (2008).
- 687 20. Sands, T. T. *et al.* Autism and developmental disability caused by KCNQ3 gain-of-  
688 function variants. *Ann. Neurol.* **86**, 181–192 (2019).
- 689 21. Luo, X. *et al.* Clinically severe CACNA1A alleles affect synaptic function and

- 690 neurodegeneration differentially. *PLoS Genet.* **13**, e1006905 (2017).
- 691 22. Kortüm, F. *et al.* Mutations in KCNH1 and ATP6V1B2 cause Zimmermann-Laband  
692 syndrome. *Nat. Genet.* **47**, 661–667 (2015).
- 693 23. Lelieveld, S. H. *et al.* Meta-analysis of 2,104 trios provides support for 10 new genes  
694 for intellectual disability. *Nat. Neurosci.* **19**, 1194–1196 (2016).
- 695 24. Karczewski, K. J. *et al.* The mutational constraint spectrum quantified from variation  
696 in 141,456 humans. *Nature* **581**, 434–443 (2020).
- 697 25. Samocha, K. E. *et al.* Regional missense constraint improves variant deleteriousness  
698 prediction. *bioRxiv* 148353 (2017). doi:10.1101/148353
- 699 26. Aguet, F. *et al.* The GTEx Consortium atlas of genetic regulatory effects across human  
700 tissues. *Science* (80-. ). **369**, 1318–1330 (2020).
- 701 27. Daniil, G. *et al.* CACNA1H Mutations Are Associated With Different Forms of  
702 Primary Aldosteronism. *EBioMedicine* **13**, 225–236 (2016).
- 703 28. Zhang, X. Y. *et al.* Gain-of-function mutations in SCN11A cause familial episodic  
704 pain. *Am. J. Hum. Genet.* **93**, 957–66 (2013).
- 705 29. Heyne, H. O. *et al.* De novo variants in neurodevelopmental disorders with epilepsy.  
706 *Nat. Genet.* **50**, 1048–1053 (2018).
- 707 30. Heyne, H. O. *et al.* Predicting functional effects of missense variants in voltage-gated  
708 sodium and calcium channels. *Sci. Transl. Med.* **12**, eaay6848 (2020).
- 709 31. Veeramah, K. R. *et al.* Exome sequencing reveals new causal mutations in children  
710 with epileptic encephalopathies. *Epilepsia* **54**, 1270–1281 (2013).
- 711 32. Gorman, K. M. *et al.* Bi-allelic Loss-of-Function CACNA1B Mutations in Progressive  
712 Epilepsy-Dyskinesia. *Am. J. Hum. Genet.* **104**, 948–956 (2019).
- 713 33. Chiocchetti, A. G. *et al.* Transcriptomic signatures of neuronal differentiation and their  
714 association with risk genes for autism spectrum and related neuropsychiatric disorders.  
715 *Transl. Psychiatry* **6**, (2016).
- 716 34. Cang, C. *et al.* mTOR regulates lysosomal ATP-sensitive two-pore Na(+) channels to  
717 adapt to metabolic state. *Cell* **152**, 778–790 (2013).
- 718 35. Reijnders, M. R. F. *et al.* Variation in a range of mTOR-related genes associates with  
719 intracranial volume and intellectual disability. *Nat. Commun.* **8**, 1052 (2017).
- 720 36. Reuter, M. S. *et al.* The Cardiac Genome Clinic: implementing genome sequencing in  
721 pediatric heart disease. *Genet. Med.* **22**, 1015–1024 (2020).
- 722 37. Retterer, K. *et al.* Clinical application of whole-exome sequencing across clinical  
723 indications. *Genet. Med.* **18**, 696–704 (2016).
- 724 38. Wright, C. F. *et al.* Genetic diagnosis of developmental disorders in the DDD study: a  
725 scalable analysis of genome-wide research data. *Lancet* **385**, 1305–1314 (2015).
- 726 39. Harrow, J. *et al.* GENCODE: The reference human genome annotation for The  
727 ENCODE Project. *Genome Res.* **22**, 1760–1774 (2012).
- 728 40. Boutet, E. *et al.* UniProtKB/Swiss-Prot, the Manually Annotated Section of the  
729 UniProt KnowledgeBase: How to Use the Entry View. *Methods Mol. Biol.* **1374**, 23–  
730 54 (2016).
- 731 41. Finn, R. D. *et al.* The Pfam protein families database: towards a more sustainable  
732 future. *Nucleic Acids Res.* **44**, D279–D285 (2016).
- 733 42. McLaren, W. *et al.* The Ensembl Variant Effect Predictor. *Genome Biol.* **17**, 1–14  
734 (2016).
- 735 43. Kumar, P., Henikoff, S. & Ng, P. C. Predicting the effects of coding non-synonymous  
736 variants on protein function using the SIFT algorithm. *Nat. Protoc.* **4**, 1073–1081  
737 (2009).
- 738 44. Adzhubei, I. A. *et al.* A method and server for predicting damaging missense  
739 mutations. *Nat. Methods* **7**, 248–9 (2010).

- 740 45. Kircher, M. *et al.* A general framework for estimating the relative pathogenicity of  
741 human genetic variants. *Nat. Genet.* **46**, 310–315 (2014).
- 742 46. Richards, S. *et al.* Standards and guidelines for the interpretation of sequence variants:  
743 a joint consensus recommendation of the American College of Medical Genetics and  
744 Genomics and the Association for Molecular Pathology. *Genet. Med.* **17**, 405–24  
745 (2015).
- 746 47. Krieger, E., Koraimann, G. & Vriend, G. Increasing the precision of comparative  
747 models with YASARA NOVA—a self-parameterizing force field. *PROTEINS Struct.*  
748 *Funct. Bioinforma.* **47**, 393–402 (2002).
- 749 48. Vriend, G. WHAT IF: A molecular modeling and drug design program. *J. Mol. Graph.*  
750 **8**, 52–56 (1990).
- 751 49. Lek, M. *et al.* Analysis of protein-coding genetic variation in 60,706 humans. *Nature*  
752 **536**, 285–291 (2016).
- 753 50. Aguet, F. *et al.* Genetic effects on gene expression across human tissues. *Nature* **550**,  
754 204–213 (2017).
- 755
- 756
